# Supplementary material for: Geographic health inequalities in Norway: a Gini analysis of cross-county differences in mortality from 1980 to 2014
Source: Springer Nature journal article supplement (doi:10.1186/s12939-018-0771-7), 2018-05-24
Supplement: MOESM1 [file 15790414]

### A. Males

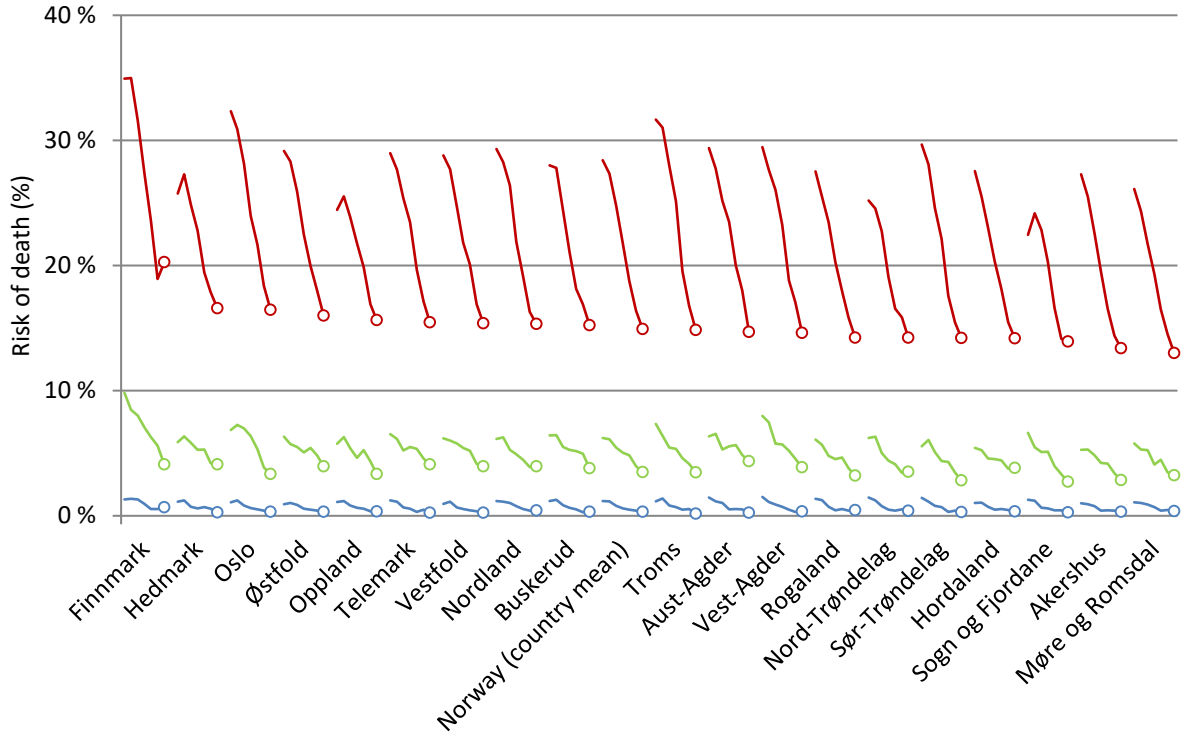

### B. Females

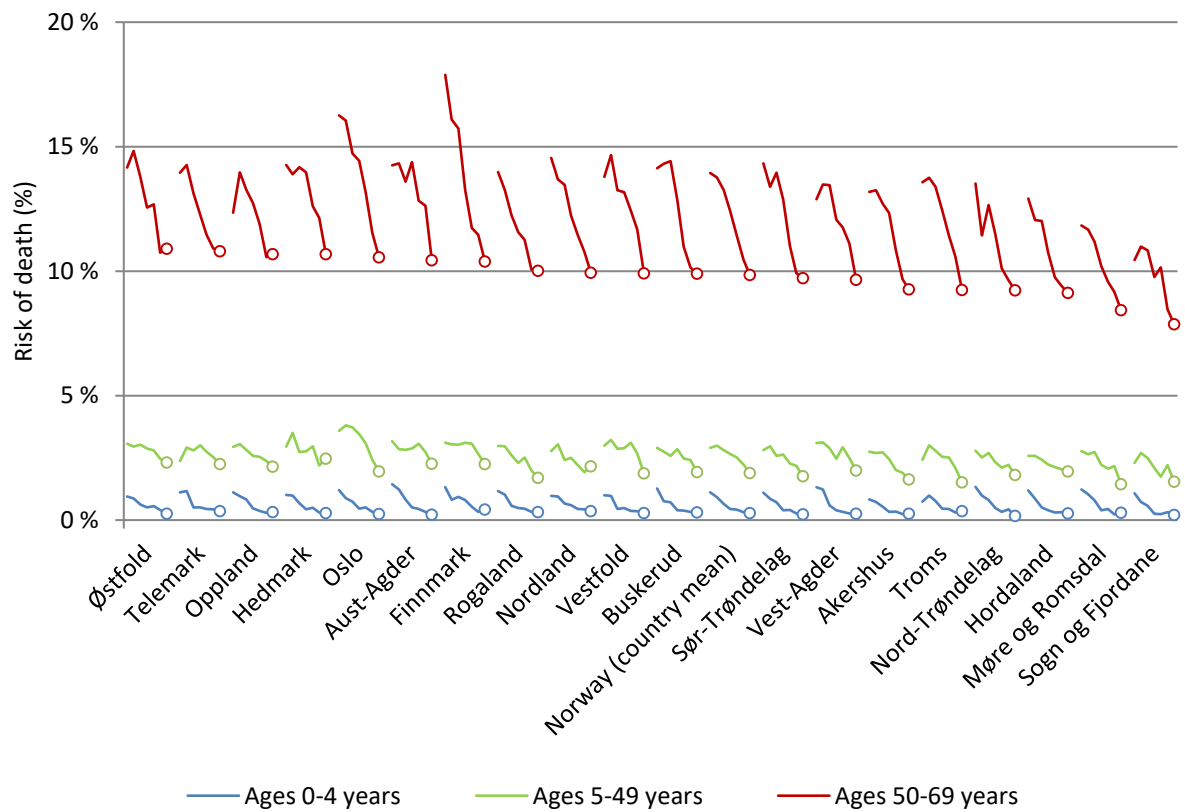

**Appendix 1.** Trendlines for risks of death in each county for selected age ranges, 1980-2014. The graphs are based on life tables estimated for five year periods. The circle represents the risk of death for the period 2010-2014. A: Males. B: Females.
