# Supplementary material for: Geographic health inequalities in Norway: a Gini analysis of cross-county differences in mortality from 1980 to 2014
Source: Springer Nature journal article supplement (doi:10.1186/s12939-018-0771-7), 2018-05-24
Supplement: MOESM2 [file 15790414]

## A. Females

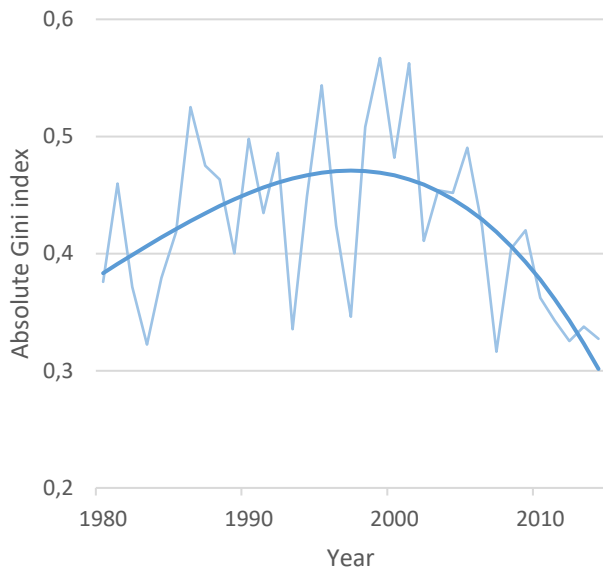

— Life expectancy at birth

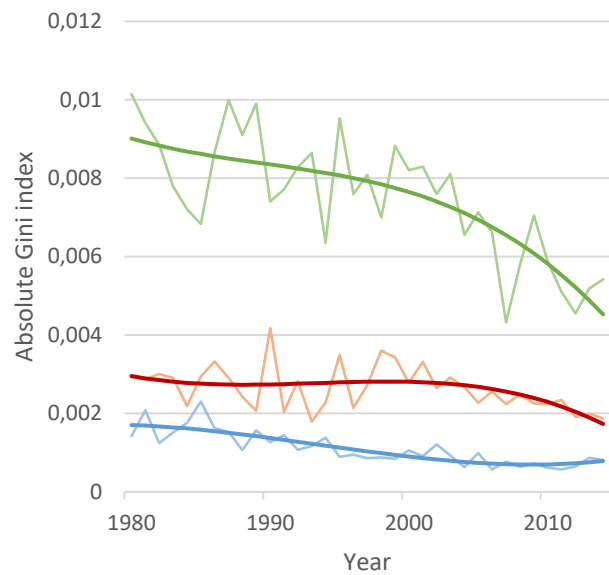

— Ages 0-4 years — Ages 5-49 years — Ages 50-69 years

## B. Males

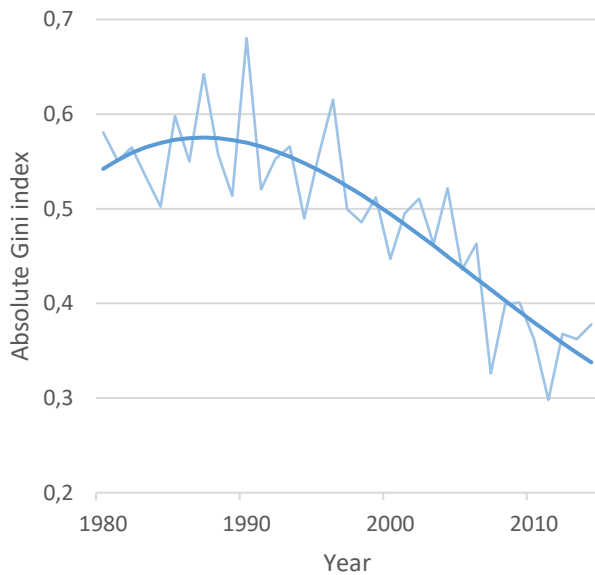

— Life expectancy at birth

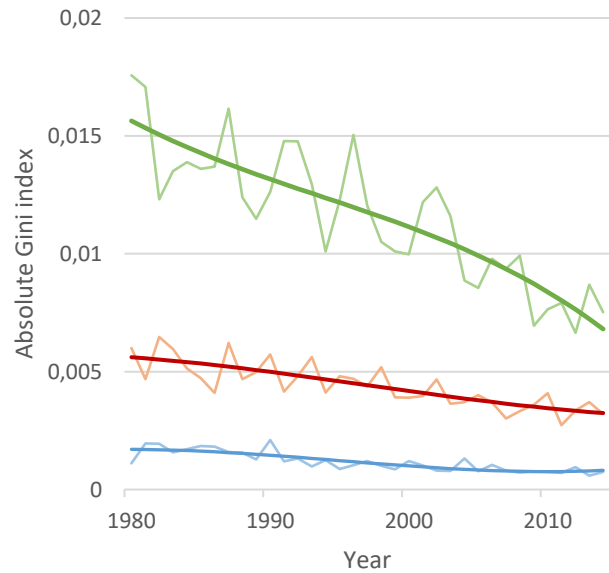

— Ages 0-4 — Ages 50-69 — Ages 5-49

**Appendix 2.** Absolute Gini indices for life expectancy at birth and risks of death at ages 0-4, 5-49 and 50-69, 1980-2014. All trendlines are smoothed using third degree regression. A: Females. B: Males.
